# Supplementary material for: Phylogenetic and antimicrobial resistance gene analysis of Salmonella Typhimurium strains isolated in Brazil by whole genome sequencing
Source: PLoS One. 2018 Aug 13;13(8):e0201882. doi: 10.1371/journal.pone.0201882 (PMC6089434; doi:10.1371/journal.pone.0201882)
Supplement: S1 Table — (XLSX) [file pone.0201882.s001.xlsx]

## Sheet: Plan1
CFSAN nº	Isolate name	WGS accession nº	Contigs	CDS	Lenght (Mb)	Coverage	CG%
CFSAN033848	STm01	LVHC00000000	112	5.011	5,092,210	96	51.9
CFSAN033849	STm02	LVHB00000000	177	4.924	5,009,320	86	52.1
CFSAN033850	STm03	LVHA00000000	122	4.948	5,049,210	76	52.1
CFSAN033851	STm04	LVGZ00000000	108	4.756	4,924,115	46	52.1
CFSAN033852	STm05	LVGY00000000	139	4.975	5,094,809	93	52
CFSAN033853	STm06	LVGX00000000	66	4.745	4,907,830	35	52.2
CFSAN033854	STm07	LVGW00000000	119	5.195	5,249,967	98	51.9
CFSAN033856	STm09	LVGV00000000	87	4.759	4,944,588	44	52.1
CFSAN033857	STm10	LVGU00000000	89	4.625	4,776,711	79	52.1
CFSAN033858	STm11	LVGT00000000	106	4.79	4,942,736	69	52.1
CFSAN033859	STm12	LUJG00000000	368	4.94	5,134,739	47	52
CFSAN033860	STm13	LVGS00000000	136	4.838	5,001,122	57	52.1
CFSAN033861	STm14	LVGR00000000	110	4.75	4,924,800	97	52.1
CFSAN033862	STm15	LVGQ00000000	47	4.606	4,781,453	60	52.1
CFSAN033863	STm16	LVGP00000000	114	4.856	5,000,205	62	52.1
CFSAN033864	STm17	LVGO00000000	199	4.52	4,748,410	36	52.1
CFSAN033865	STm18	LVGN00000000	165	4.525	4,787,058	36	52.2
CFSAN033866	STm19	LVGM00000000	385	4.871	5,043,047	97	52
CFSAN033867	STm20	LVGL00000000	407	4.983	5,141,848	106	52.1
CFSAN033868	STm21	LUJF00000000	655	4.976	5,181,927	72	51.9
CFSAN033869	STm22	LVGK00000000	242	5.003	5,192,315	28	52
CFSAN033870	STm23	LVGJ00000000	260	4.812	5,056,017	40	51.8
CFSAN033871	STm24	LVGI00000000	124	5.042	5,175,946	43	52.1
CFSAN033872	STm25	LVGH00000000	121	5.058	5,190,931	60	51.9
CFSAN033873	STm26	LVGG00000000	135	4.998	5,097,329	76	52
CFSAN033874	STm27	LVGF00000000	175	5.132	5,186,204	128	52
CFSAN033875	STm28	LUJE00000000	827	4.628	4,960,492	183	52
CFSAN033876	STm29	LVGE00000000	74	4.663	4,893,788	13	52.2
CFSAN033877	STm30	LVGD00000000	51	4.663	4,887,506	33	52.2
CFSAN033878	STm31	LUJD00000000	270	4.739	4,963,458	39	52.2
CFSAN033879	STm32	LVGC00000000	70	4.722	4,915,757	40	52.2
CFSAN033880	STm33	LVGB00000000	64	4.722	4,915,336	45	52.1
CFSAN033881	STm34	LVGA00000000	72	4.793	4,974,765	49	52.1
CFSAN033882	STm35	LVFZ00000000	62	4.75	4,928,100	50	52.2
CFSAN033883	STm36	LVFY00000000	74	4.69	4,918,167	45	52
CFSAN033884	STm37	LVFX00000000	49	4.588	4,839,700	33	52.2
CFSAN033885	STm38	LUJC00000000	188	4.672	4,912,039	33	52.1
CFSAN033886	STm39	LUJB00000000	201	4.663	4,912,638	41	52.2
CFSAN033887	STm40	LUJA00000000	187	4.662	4,937,549	32	52.1
CFSAN033888	STm41	LVFW00000000	75	4.792	5,014,685	26	51.7
CFSAN033889	STm42	LUIZ00000000	246	4.758	5,010,196	43	51.8
CFSAN033890	STm43	LVFV00000000	80	4.832	5,012,771	48	51.8
CFSAN033891	STm44	LVFU00000000	61	4.783	4,927,855	46	52.2
CFSAN033892	STm45	LUIY00000000	229	4.837	5,105,924	26	51.8
CFSAN033893	STm46	LVFT00000000	89	4.785	5,004,449	29	51.8
CFSAN033894	STm47	LUIX00000000	273	4.745	4,968,525	37	52.2
CFSAN033895	STm48	LUIW00000000	331	4.759	4,977,916	42	52.1
CFSAN033896	STm49	LVFS00000000	99	4.555	4,788,552	69	52.2
CFSAN033897	702/99	LVFR00000000	67	4.668	4,843,131	56	52.2
CFSAN033898	12288/06	LUIV00000000	218	4.821	5,044,466	262	51.8
CFSAN033899	12278/06	LUIU00000000	212	4.821	5,060,774	214	51.8
CFSAN033900	12290/06	LUIT00000000	227	4.883	5,108,150	85	51.7
CFSAN033901	12268/06	LVFQ00000000	112	4.89	5,101,382	32	51.8
CFSAN033902	12381/06	LUIS00000000	196	4.815	5,063,283	155	51.7
CFSAN033903	5936/06	LUIR00000000	179	4.423	4,693,310	104	52.2
CFSAN033904	5937/06	LUIQ00000000	233	4.499	4,773,998	31	52.2
CFSAN033905	5934/06	LUIP00000000	227	4.704	4,974,318	644	51.9
CFSAN033906	5961/06	LUIO00000000	201	4.662	4,913,997	91	51.9
CFSAN033907	5962/06	LVFP00000000	94	4.769	4,964,408	44	51.9
CFSAN033908	5929/06	LUIN00000000	183	4.436	4,701,080	282	52.1
CFSAN033909	13609/06	LUIM00000000	198	4.628	4,847,436	94	52.1
CFSAN033910	3848/08	LUIL00000000	175	4.429	4,699,918	200	52.1
CFSAN033911	16238/09	LUIK00000000	181	4.792	5,030,973	87	51.9
CFSAN033912	16239/09	LVFO00000000	94	4.705	4,901,203	30	52.1
CFSAN033913	16240/09	LUIJ00000000	214	4.665	4,874,510	146	52.1
CFSAN033914	16202/09	LUII00000000	175	4.524	4,786,890	122	52.2
CFSAN033915	16251/09	LUIH00000000	255	4.819	5,062,047	753	51.8
CFSAN033916	16273/09	LVFN00000000	92	4.707	4,888,782	43	52.2
CFSAN033917	17307/09	LUIG00000000	229	4.806	5,044,442	323	51.9
CFSAN033918	9461/10	LUIF00000000	160	4.521	4,787,651	121	52.2
CFSAN033919	9479/10	LUIE00000000	255	4.72	4,918,476	71	52.1
CFSAN033920	7032/10	LVFM00000000	173	4.913	5,015,360	155	51.9
CFSAN033921	3057/10	LUID00000000	196	4.59	4,853,362	752	52.2
CFSAN033922	6346/10	LUIC00000000	227	4.643	4,843,468	131	52.2
CFSAN033923	5635/10	LVFL00000000	183	4.556	4,794,555	94	52.1
CFSAN033924	9109/10	LVFK00000000	82	4.697	4,890,642	29	52.2
CFSAN033925	426/10	LUIB00000000	192	4.542	4,803,417	375	52.2
CFSAN033926	447/10	LUIA00000000	193	4.526	4,796,441	317	52.1
CFSAN033927	2452/11	LUHZ00000000	210	4.73	4,933,723	84	52.1
CFSAN033928	6709/11	LVFJ00000000	90	4.71	4,935,415	27	52
CFSAN033929	948/12	LUHY00000000	196	4.627	4,843,555	70	52.2
CFSAN033930	1103/12	LUHX00000000	207	4.629	4,846,466	96	52.2
CFSAN033931	1104/12	LVFI00000000	74	4.722	4,893,271	42	52.2
CFSAN033932	3330/12	LUHW00000000	193	4.634	4,864,341	104	52.2
CFSAN033933	994/13	LUHV00000000	187	4.592	4,814,064	117	52
CFSAN033934	374/13	LUHU00000000	180	4.538	4,798,856	159	52.1
CFSAN033935	465/13	LUHT00000000	239	5.078	5,259,138	223	51.7
CFSAN033937	622/13	LUHS00000000	202	4.568	4,799,277	108	52.1
CFSAN033938	583/13	LUHR00000000	286	4.712	4,939,161	246	52
CFSAN033939	623/13	LVFH00000000	89	4.667	4,884,419	23	52.1
			16016
